# Supplementary material for: Generation of Doubled Haploid Transgenic Wheat Lines by Microspore Transformation
Source: PubMed Central journal article supplement (PMC3832437; doi:10.1371/journal.pone.0080155), 2013-11-18

**(a)  $\beta$ -glucuronidase**

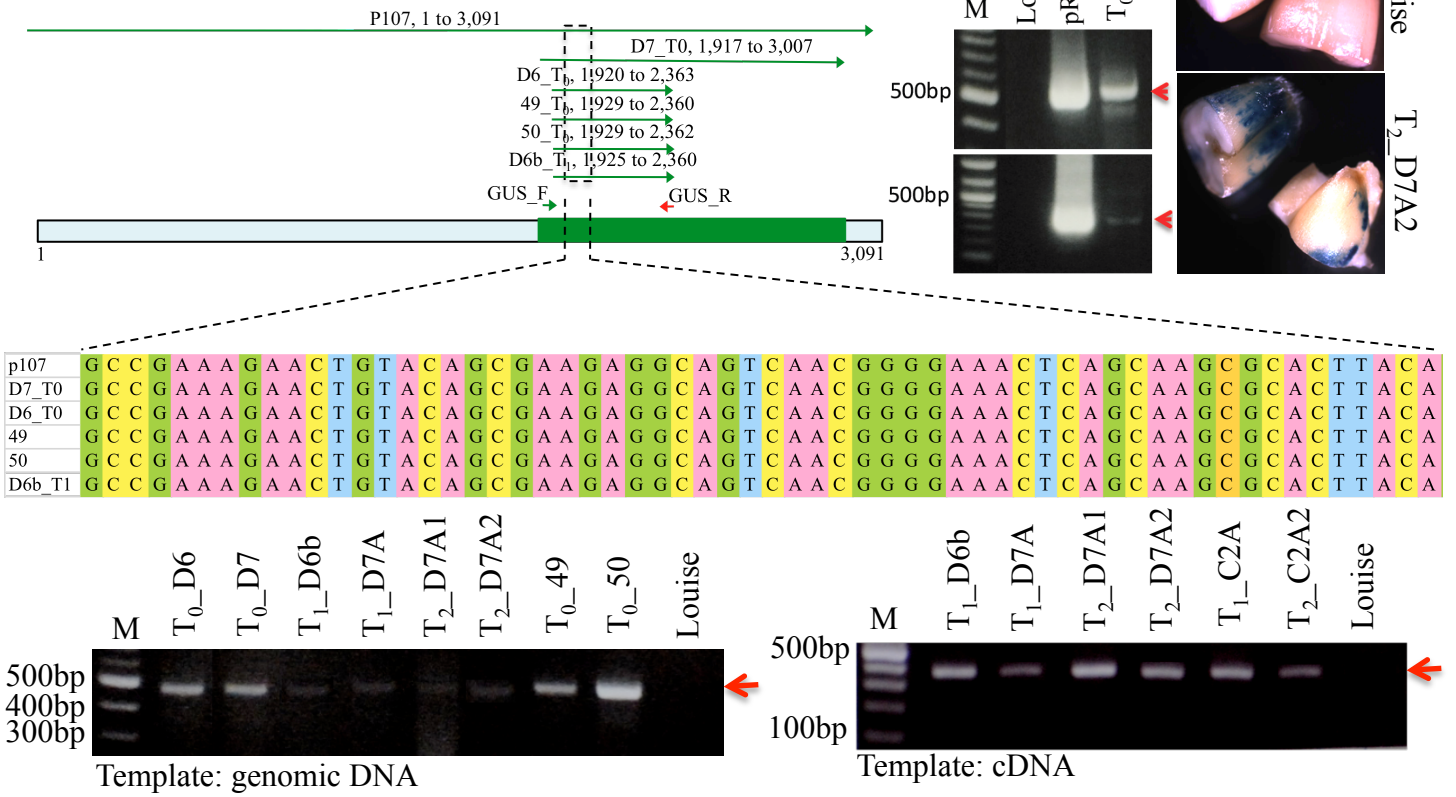

**(b) Endochitinase**

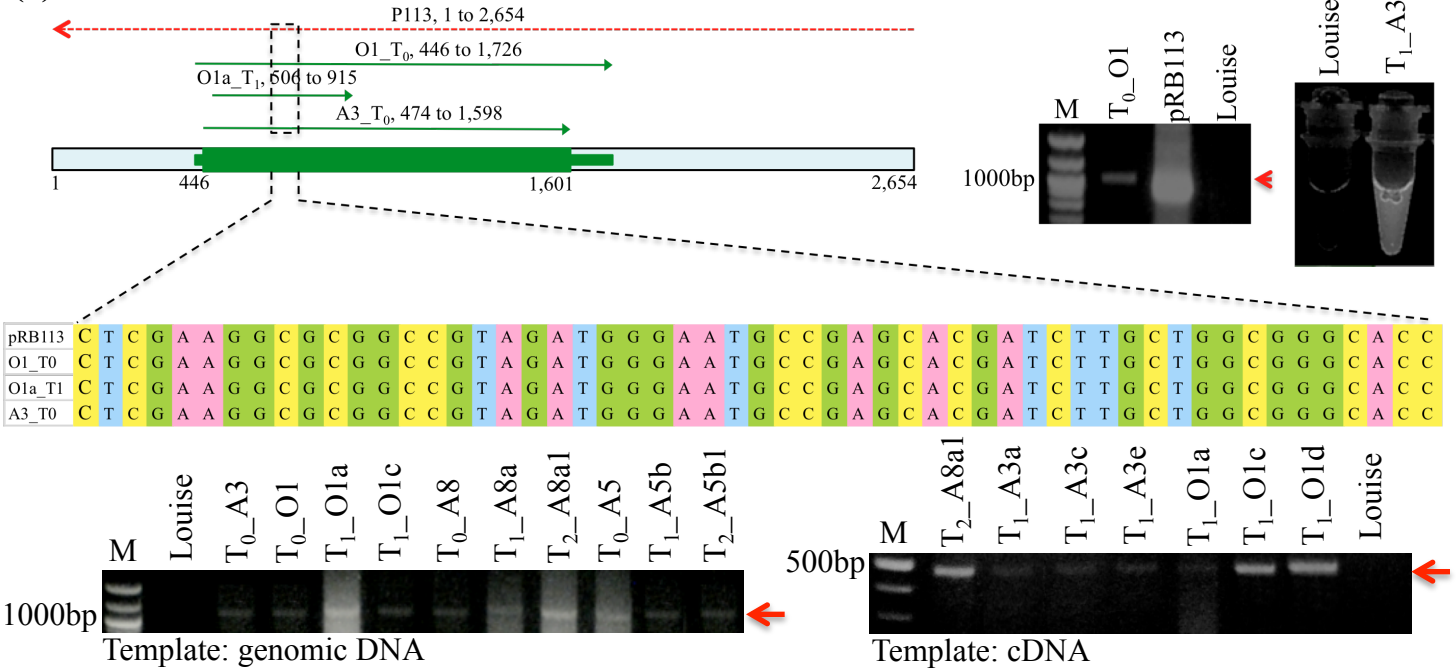

Supplement: pone.0080155.s005.pdf [file pone.0080155.s005.pdf]
